# Supplementary material
Source: PubMed Central journal article supplement (PMC3406666)
Supplement: supp_M112.339622_SI_text.pdf [file supp_M112.339622_SI_text.pdf]

## **Supplemental Information**

### **Primary Mesenchymal Stem and Progenitor Cells from Bone Marrow Lack Expression of CD44**

Hong Qian<sup>1,2\*</sup>, Katarina Le Blanc<sup>2</sup>, Mikael Sigvardsson<sup>1</sup>

#### **Supplemental data:**

Figure S1: related to Figure 3;

Figure S2: related to Figure 4A;

Figure S3: related to Figure 4B;

Figure S4: related to Figure 7;

Figure S5: related to Figure 7;

Table S1-S3, related to Figure 4B.

#### **Supplemental materials:**

Antibodies used for flow cytometry.

Probes used for Q-PCR.

**Supplemental Data:**

**Fig. S1. (Qian, et al)**

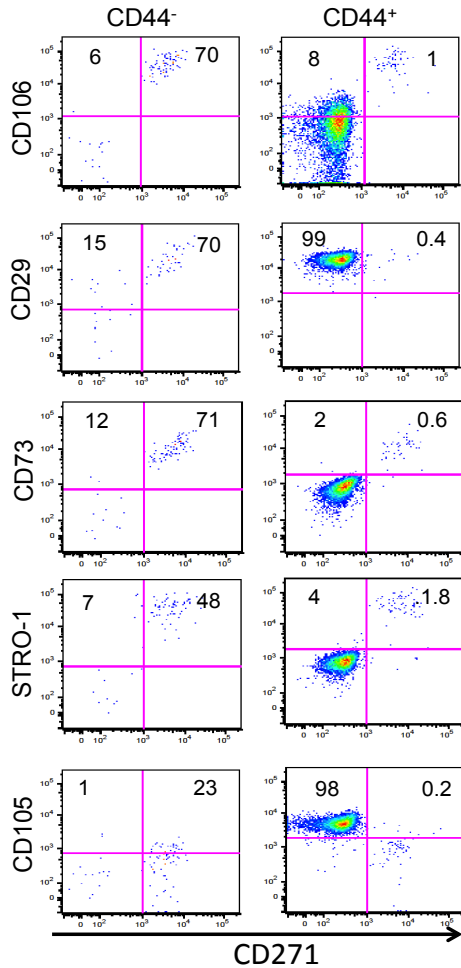

**Supplemental Figure 1. FACS analysis of STRO1, CD73, CD29, CD105 and CD106 expression on the CD44<sup>-</sup> mesenchymal cells of human bone marrow.** The stromal cells were first enriched by MACS using CD45 and CD235 microbeads. The enriched cells were stained with fluorochrome conjugated antibodies against CD45, CD235, CD31, CD44, CD271 and the respective cell surface markers. The CD44<sup>+</sup> and CD44<sup>-</sup> cells were gated within CD45<sup>-</sup>CD235<sup>-</sup>CD31<sup>-</sup> live cells. The data were from 3 independent experiments with 3 healthy young adult donors. The numbers in the panels are mean % of the CD44<sup>+</sup> or CD44<sup>-</sup> cells.

**Fig. S2. (Qian, et al)**

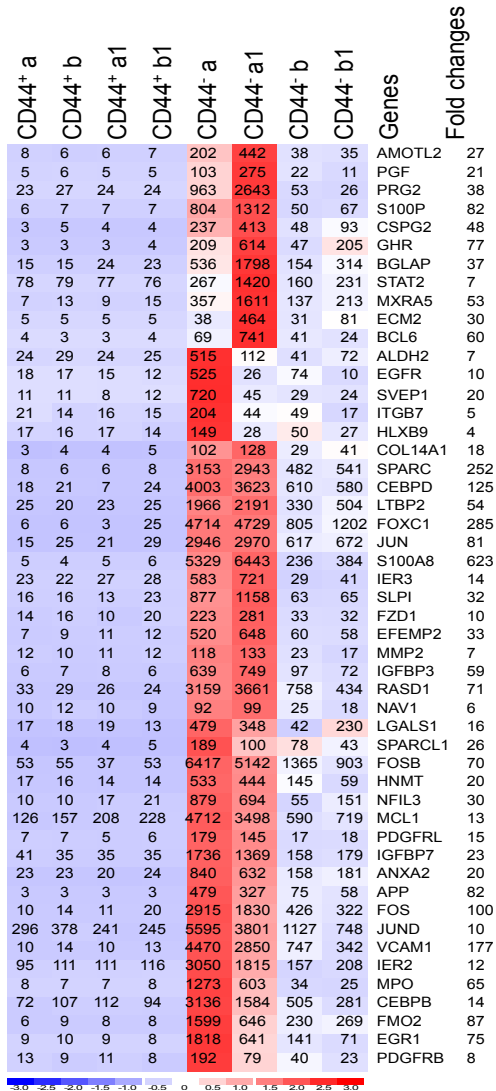

**Supplemental Figure 2. Up-regulation of MSC-related genes, oncogenes and anti-apoptotic genes in the CD44<sup>-</sup> cells.** dCHIP analysis of global gene expression in the freshly sorted CD44<sup>+</sup> cells and CD44<sup>-</sup> cells from normal human BM. Clustering shows some of the genes being up-regulated more than 4-fold in the CD44<sup>-</sup> cells compared to the CD44<sup>+</sup> cells. Red represents high and blue low expression. Data were from 2 independent sorting experiments, 4 microarray experiments. The numbers in the heat map are expression values of each indicated genes, normalized by dCHIP software. Related to Figure 4.

Fig. S3 (Qian, et al.,)

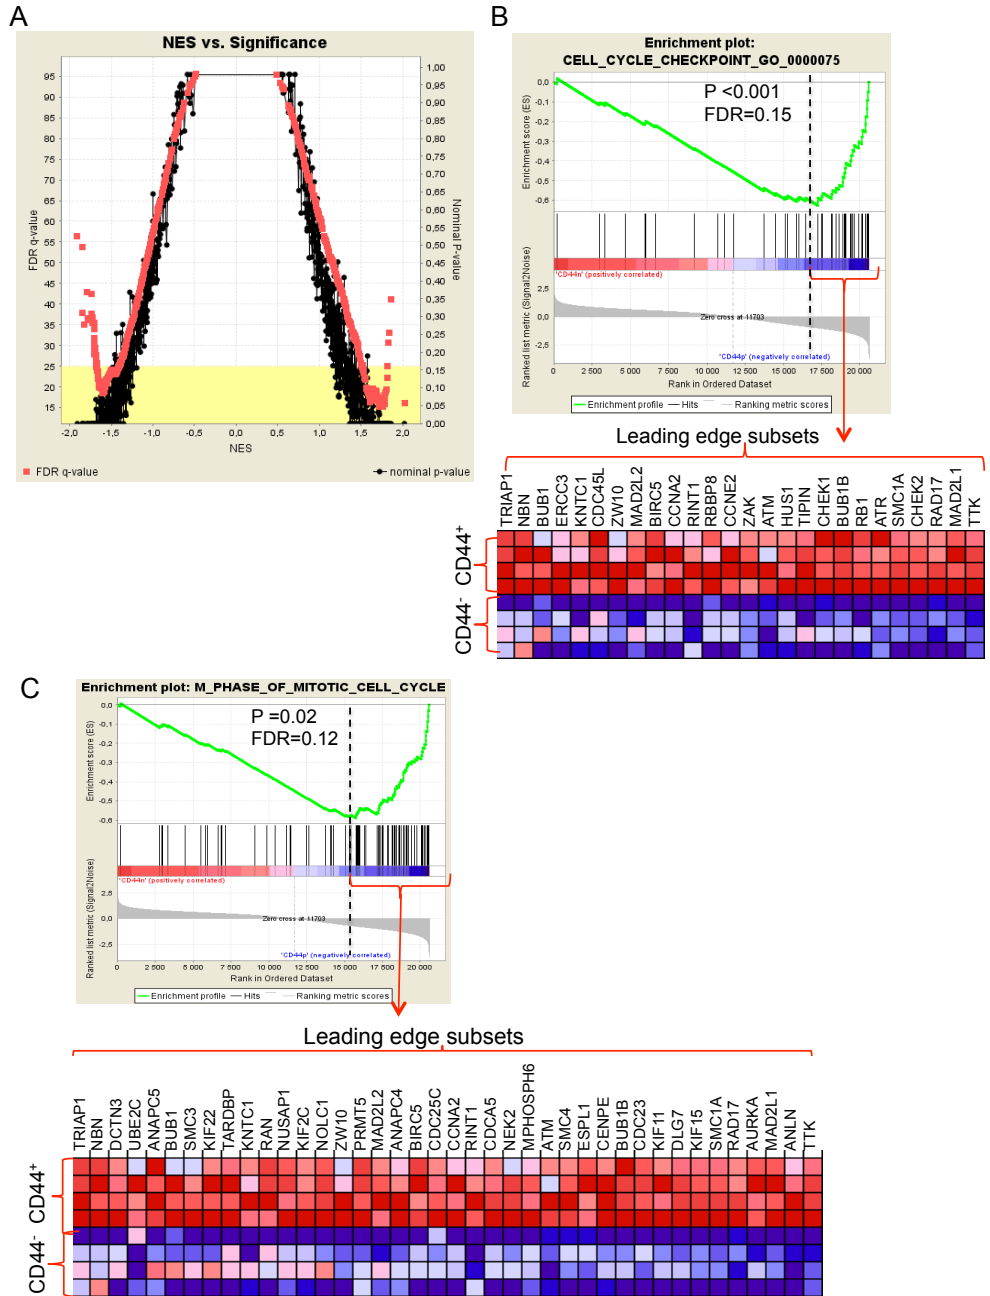

**Supplemental Figure 3. GSEA analysis of cell-cycle regulator genes in the CD44<sup>+</sup> cells.**

(A) Plot of p values versus normalized enrichment scores (NES) shows the number of enriched gene sets that are significantly different between the two cell populations. False discovery rate (FDR)-q value is the estimated probability that the normalized enrichment score represents a false positive finding. NES is the enrichment score for the gene set after it has been normalized across analyzed gene sets. (B-C) Enrichment of cell cycle genes in the CD44<sup>+</sup> cells. (B) Enrichment of the genes in the gene set for M phase mitotic cell cycle. (C) Enrichment of genes in the gene set

of cell cycle checkpoint in the CD44<sup>+</sup> cells. The green curves plot the ES. Black vertical dashed lines specify the maximum ES scores. Within each gene set, the farther the position of a gene to the left (red) implies a higher correlation with CD44 negative phenotype, and the farther to the right (blue) implies a higher correlation with genes down-regulated upon CD44 expression. Significantly enriched data sets are defined according to GSEA default settings ( $p < 0.001$  and  $FDR < 0.25$ ). The heatmap shows expressions of the genes in the leading edge subsets (only the top 40 genes were shown for clarity if more than 40 genes in the leading edge subsets). Data were from 8 microarray platforms and 2 independent experiments. The data were normalized by RMAExpress software. Related to Figure 4.

**Fig. S4 (Qian, et al.,)**

**A**

**WNT SIGNALING PATHWAY**

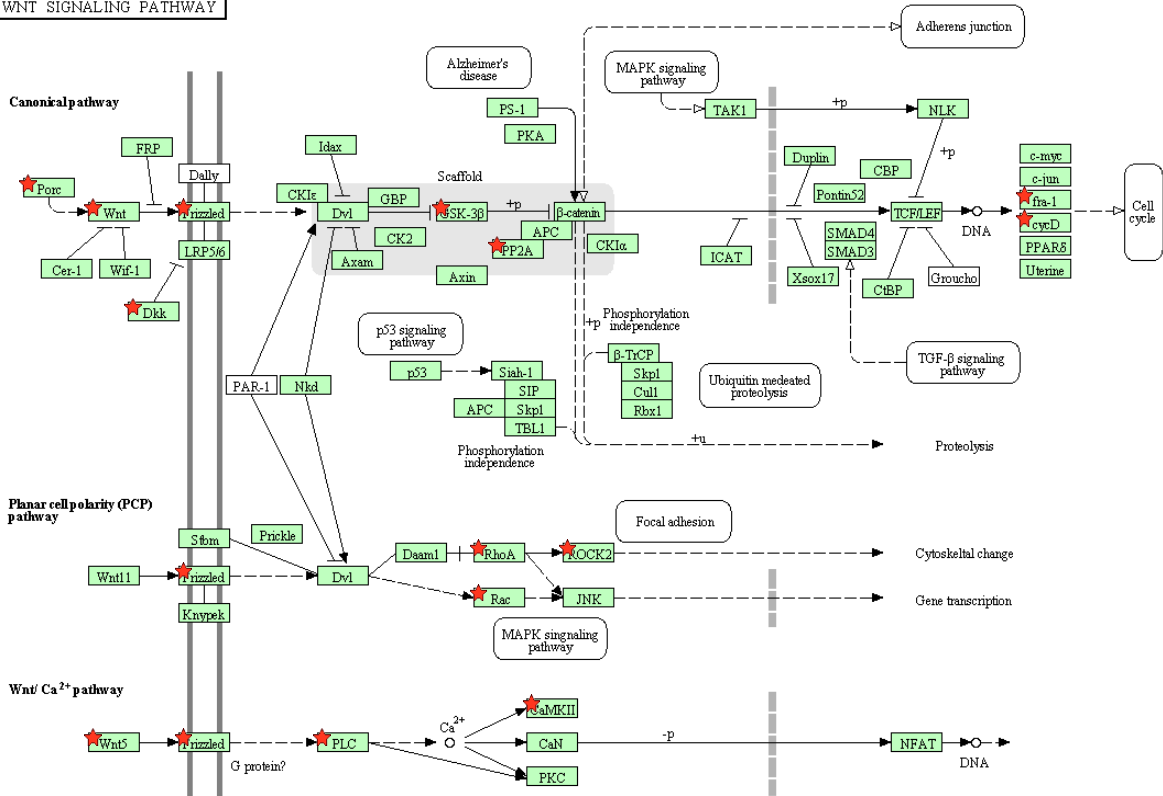

**B**

**FOCAL ADHESION**

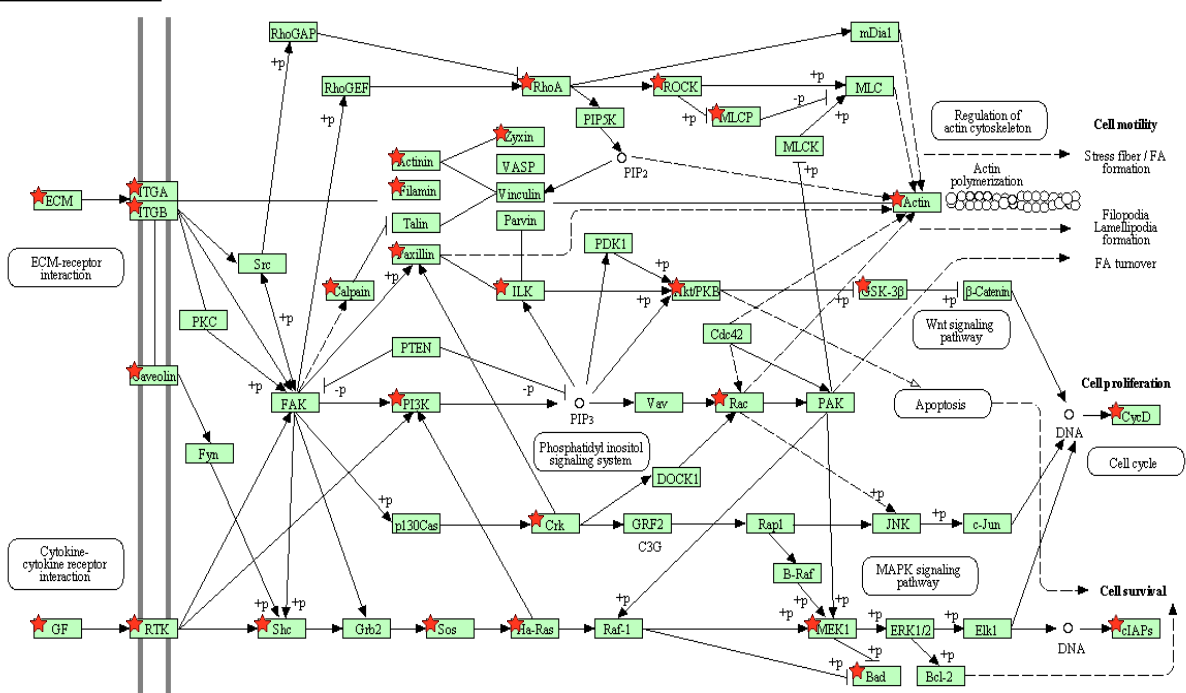

**Supplemental Figure 4. The biological pathways analysis of the genes in culture-expanded human BM MSCs.** The genes from microarray data that are more than 5-fold upregulated in the culture-expanded MSCs compared to the freshly sorted CD44<sup>+</sup> cells were used for mapping KEGG pathways using the Database for Annotation, Visualization and Integrated Discovery (DAVID ) Bioinformatics resources v6.7 (<http://david.abcc.ncifcrf.gov/tools.jsp>). (A), WNT signal pathway. (B) Focal adhesion pathway. Red stars indicate the genes are more than 5 fold increase in the cultured MSCs compared to the freshly sorted CD44<sup>+</sup> cells.

**Fig. S5 (Qian, et al.,)**

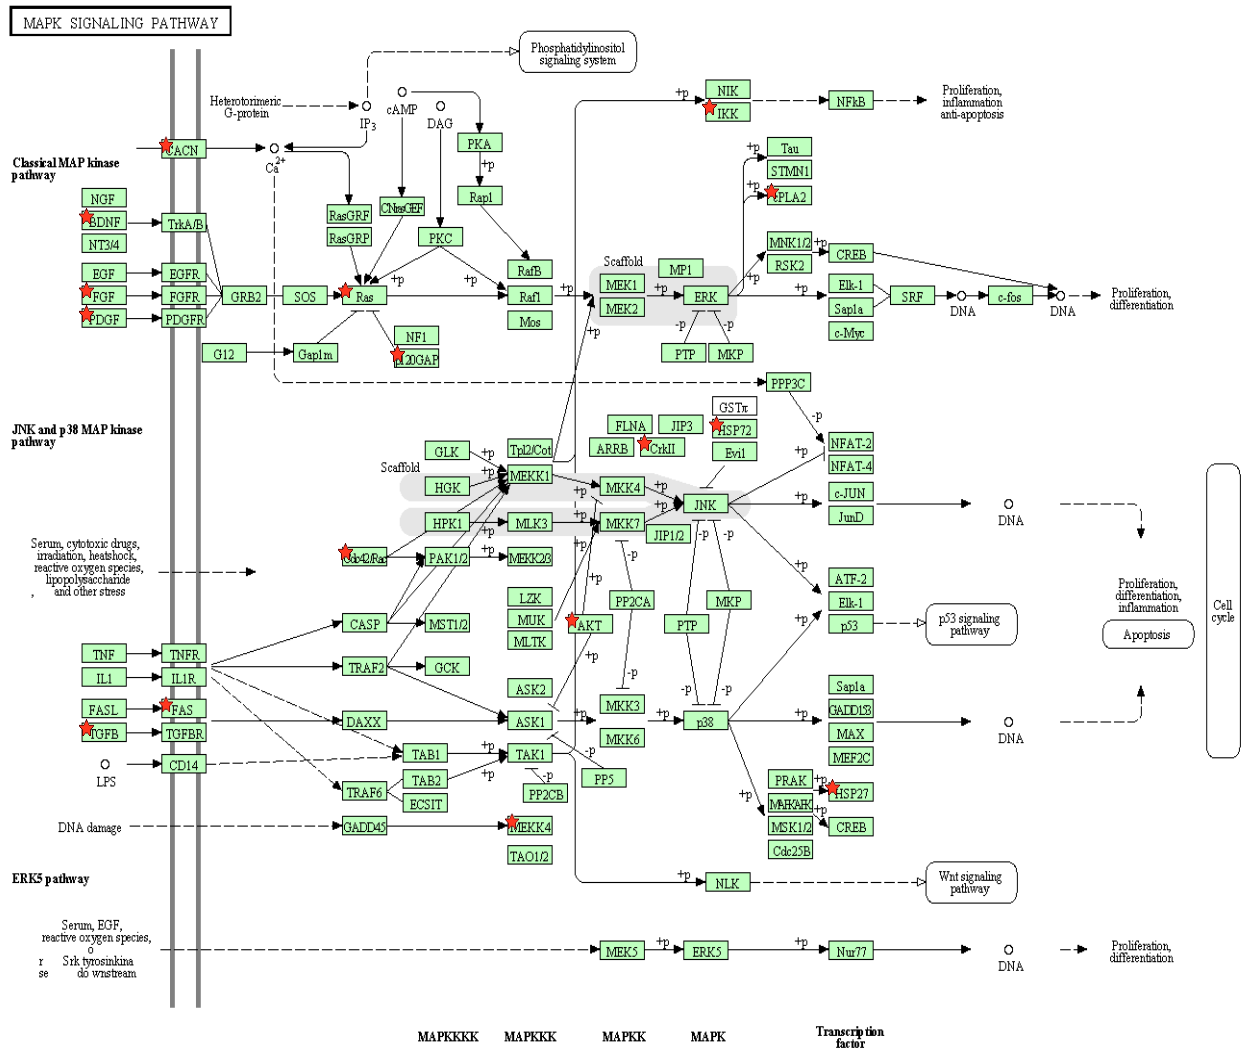

**Supplemental Figure 5. Upregulation of the genes in MAPK pathway in culture-expanded human BM MSCs.** The genes from microarray data that are more than 5-fold upregulated in the culture-expanded MSCs compared to the freshly sorted CD44<sup>-</sup> cells were used for mapping MAPK signal pathway analyzed using the DAVID Bioinformatics resources v6.7. Red stars indicate the genes are more than 5 fold increase in the cultured MSCs compared to the freshly sorted CD44<sup>-</sup> cells.



**Supplemental Table 1. GSEA analysis of enrichment of gene sets that are positively correlated to CD44<sup>+</sup> phenotype. Related to Figure 4.**

| NAME                                                              | SIZE | ES   | NES  | NOM p-value | FDR q-value |
|-------------------------------------------------------------------|------|------|------|-------------|-------------|
| RESPONSE_TO_WOUNDING                                              | 180  | 0.28 | 1.74 | 0.00        | 0.15        |
| HSA04510_FOCAL_ADHESION                                           | 194  | 0.20 | 1.72 | 0.00        | 0.15        |
| EXTRACELLULAR_REGION                                              | 425  | 0.30 | 1.77 | 0.00        | 0.15        |
| EXTRACELLULAR_MATRIX_STRUCTURAL_CONSTITUENT                       | 25   | 0.49 | 1.74 | 0.00        | 0.15        |
| POSITIVE_REGULATION_OF_METABOLIC_PROCESS                          | 213  | 0.11 | 1.75 | 0.00        | 0.16        |
| CATION_HOMEOSTASIS                                                | 103  | 0.23 | 1.78 | 0.00        | 0.16        |
| HSA00641_3_CHLOROACRYLIC_ACID_DEGRADATION                         | 15   | 0.54 | 2.02 | 0.00        | 0.16        |
| AMINE_RECEPTOR_ACTIVITY                                           | 34   | 0.46 | 1.74 | 0.00        | 0.16        |
| TRANSMEMBRANE_RECEPTOR_PROTEIN_KINASE_ACTIVITY                    | 51   | 0.38 | 1.72 | 0.00        | 0.16        |
| POSITIVE_REGULATION_OF_CYTOKINE_BIOSYNTHETIC_PROCESS              | 25   | 0.37 | 1.77 | 0.00        | 0.16        |
| EXTRACELLULAR_REGION_PART                                         | 321  | 0.30 | 1.74 | 0.00        | 0.17        |
| CENTRAL_NERVOUS_SYSTEM_DEVELOPMENT                                | 112  | 0.21 | 1.61 | 0.00        | 0.17        |
| CELL_JUNCTION                                                     | 76   | 0.30 | 1.61 | 0.00        | 0.17        |
| CHEMICAL_HOMEOSTASIS                                              | 146  | 0.19 | 1.67 | 0.00        | 0.17        |
| NERVOUS_SYSTEM_DEVELOPMENT                                        | 360  | 0.21 | 1.62 | 0.00        | 0.17        |
| ANATOMICAL_STRUCTURE_MORPHOGENESIS                                | 359  | 0.19 | 1.79 | 0.00        | 0.17        |
| WOUND_HEALING                                                     | 53   | 0.31 | 1.77 | 0.00        | 0.17        |
| POSITIVE_REGULATION_OF_CELLULAR_PROTEIN_METABOLIC_PROCESS         | 69   | 0.18 | 1.62 | 0.00        | 0.17        |
| REGULATION_OF_CYTOKINE_BIOSYNTHETIC_PROCESS                       | 37   | 0.35 | 1.67 | 0.00        | 0.17        |
| RESPONSE_TO_BACTERIUM                                             | 27   | 0.38 | 1.62 | 0.00        | 0.17        |
| TRANSMEMBRANE_RECEPTOR_ACTIVITY                                   | 402  | 0.30 | 1.67 | 0.00        | 0.17        |
| HSA04742_TASTE_TRANSDUCTION                                       | 45   | 0.27 | 1.66 | 0.00        | 0.18        |
| NEURITE_DEVELOPMENT                                               | 53   | 0.30 | 1.62 | 0.00        | 0.18        |
| HOMEOSTATIC_PROCESS                                               | 196  | 0.14 | 1.67 | 0.00        | 0.18        |
| EXTRACELLULAR_SPACE                                               | 234  | 0.29 | 1.62 | 0.00        | 0.18        |
| POSITIVE_REGULATION_OF_CELLULAR_METABOLIC_PROCESS                 | 206  | 0.11 | 1.70 | 0.00        | 0.18        |
| BASOLATERAL_PLASMA_MEMBRANE                                       | 31   | 0.32 | 1.60 | 0.00        | 0.18        |
| HSA04940_TYPE_I_DIABETES_MELLITUS                                 | 41   | 0.36 | 1.79 | 0.00        | 0.18        |
| CELLULAR_MORPHOGENESIS_DURING_DIFFERENTIATION                     | 49   | 0.32 | 1.60 | 0.00        | 0.18        |
| RHODOPSIN_LIKE_RECEPTOR_ACTIVITY                                  | 129  | 0.31 | 1.60 | 0.00        | 0.18        |
| SECOND_MESSENGER_MEDIATED_SIGNALING                               | 151  | 0.27 | 1.67 | 0.00        | 0.18        |
| ENDOPEPTIDASE_ACTIVITY                                            | 110  | 0.19 | 1.63 | 0.00        | 0.18        |
| TRANSMEMBRANE_RECEPTOR_PROTEIN_TYROSINE_KINASE_ACTIVITY           | 43   | 0.37 | 1.59 | 0.00        | 0.19        |
| HSA04080_NEUROACTIVE_LIGAND_RECEPTOR_INTERACTION                  | 250  | 0.35 | 1.69 | 0.00        | 0.19        |
| ADHERENS_JUNCTION                                                 | 22   | 0.46 | 1.67 | 0.00        | 0.19        |
| NEGATIVE_REGULATION_OF_CELL_DIFFERENTIATION                       | 27   | 0.34 | 1.59 | 0.00        | 0.19        |
| G_PROTEIN_SIGNALING_COUPLED_TO_CYCLIC_NUCLEOTIDE_SECOND_MESSENGER | 100  | 0.32 | 1.65 | 0.00        | 0.19        |
| ION_HOMEOSTASIS                                                   | 121  | 0.22 | 1.80 | 0.00        | 0.19        |
| CELL_MATRIX_JUNCTION                                              | 17   | 0.43 | 1.59 | 0.00        | 0.19        |
| PHOSPHOINOSITIDE_MEDIATED_SIGNALING                               | 46   | 0.30 | 1.59 | 0.00        | 0.19        |
| NEURON_DIFFERENTIATION                                            | 73   | 0.30 | 1.59 | 0.00        | 0.19        |
| G_PROTEIN_COUPLED_RECEPTOR_ACTIVITY                               | 183  | 0.30 | 1.68 | 0.00        | 0.19        |
| CYTOKINE_METABOLIC_PROCESS                                        | 40   | 0.32 | 1.64 | 0.00        | 0.19        |
| G_PROTEIN_SIGNALING_COUPLED_TO_IP3_SECOND_MESSENGER_PHOSPHOLIPASE | 43   | 0.29 | 1.58 | 0.00        | 0.19        |
| CYTOKINE_BIOSYNTHETIC_PROCESS                                     | 39   | 0.34 | 1.68 | 0.00        | 0.19        |
| HSA01430_CELL_COMMUNICATION                                       | 123  | 0.32 | 1.67 | 0.00        | 0.19        |
| AXONOGENESIS                                                      | 43   | 0.38 | 1.64 | 0.00        | 0.19        |
| CYCLIC_NUCLEOTIDE_MEDIATED_SIGNALING                              | 102  | 0.31 | 1.64 | 0.00        | 0.19        |
| POSITIVE_REGULATION_OF_PROTEIN_METABOLIC_PROCESS                  | 71   | 0.17 | 1.58 | 0.00        | 0.19        |
| HSA04610_COMPLEMENT_AND_COAGULATION_CASCADES                      | 66   | 0.34 | 1.58 | 0.00        | 0.19        |
| CELL_MIGRATION                                                    | 93   | 0.26 | 1.81 | 0.00        | 0.19        |

FDR-q value: the estimated probability that the normalized enrichment score represents a false positive finding; NES: Normalized enrichment score; the enrichment score for the gene set after it has been normalized across analyzed gene sets; Size: Number of genes in the gene set after filtering out those genes not in the expression dataset; The more interesting gene sets achieve the maximum enrichment score near the top or bottom of the ranked list;

**Supplemental Table 2. Enrichment of gene sets that are negatively correlated to CD44<sup>+</sup> phenotype. Related to Figure 4.**

| NAME                                                       | SIZE | ES    | NES   | NOM p-value | FDR q-value |
|------------------------------------------------------------|------|-------|-------|-------------|-------------|
| CELL_CYCLE_ARREST_GO_0007050                               | 55   | -0.22 | -1.66 | 0.00        | 0.23        |
| NUCLEOBASE_NUCLEOSIDE_AND_NUCLEOTIDE_METABOLIC_PROCESS     | 49   | -0.35 | -1.49 | 0.00        | 0.23        |
| CELLULAR_CATABOLIC_PROCESS                                 | 198  | -0.27 | -1.46 | 0.00        | 0.23        |
| REGULATION_OF_CYCLIN_DEPENDENT_PROTEIN_KINASE_ACTIVITY     | 42   | -0.32 | -1.66 | 0.00        | 0.23        |
| CATABOLIC_PROCESS                                          | 210  | -0.26 | -1.46 | 0.00        | 0.23        |
| MICROTUBULE_CYTOSKELETON_ORGANIZATION_AND_BIOGENESIS       | 34   | -0.46 | -1.49 | 0.00        | 0.23        |
| CELLULAR_CARBOHYDRATE_METABOLIC_PROCESS                    | 123  | -0.12 | -1.44 | 0.00        | 0.23        |
| HSA00240_PYRIMIDINE_METABOLISM                             | 85   | -0.43 | -1.51 | 0.00        | 0.23        |
| NUCLEOTIDYLTRANSFERASE_ACTIVITY                            | 45   | -0.46 | -1.48 | 0.00        | 0.23        |
| MICROTUBULE_BINDING                                        | 29   | -0.37 | -1.45 | 0.00        | 0.23        |
| CELLULAR_PROTEIN_COMPLEX_ASSEMBLY                          | 31   | -0.34 | -1.51 | 0.00        | 0.23        |
| BIOSYNTHETIC_PROCESS                                       | 433  | -0.21 | -1.45 | 0.00        | 0.23        |
| UNFOLDED_PROTEIN_BINDING                                   | 41   | -0.39 | -1.49 | 0.00        | 0.23        |
| ESTABLISHMENT_OF_ORGANELLE_LOCALIZATION                    | 17   | -0.51 | -1.46 | 0.00        | 0.23        |
| NUCLEAR_CHROMOSOME_PART                                    | 32   | -0.35 | -1.52 | 0.00        | 0.23        |
| RNA_BINDING                                                | 236  | -0.46 | -1.48 | 0.00        | 0.23        |
| RNA_SPLICING_VIA_TRANSESTERIFICATION_REACTIONS             | 32   | -0.57 | -1.52 | 0.00        | 0.23        |
| ATPASE_ACTIVITY_COUPLED                                    | 87   | -0.30 | -1.66 | 0.00        | 0.23        |
| SECRETION_BY_CELL                                          | 103  | -0.16 | -1.53 | 0.00        | 0.23        |
| HSA00450_SELENOAMINO_ACID_METABOLISM                       | 28   | -0.37 | -1.53 | 0.00        | 0.23        |
| SPINDLE_MICROTUBULE                                        | 16   | -0.70 | -1.53 | 0.00        | 0.23        |
| RNA_SPLICING_FACTOR_ACTIVITY_TRANSESTERIFICATION_MECHANISM | 18   | -0.72 | -1.53 | 0.00        | 0.22        |
| RESPONSE_TO_DNA_DAMAGE_STIMULUS                            | 151  | -0.39 | -1.66 | 0.00        | 0.22        |
| UBIQUITIN_CYCLE                                            | 46   | -0.32 | -1.54 | 0.00        | 0.22        |
| DNA_DIRECTED_RNA_POLYMERASE_II_HOLOENZYME                  | 55   | -0.53 | -1.54 | 0.00        | 0.22        |
| PHOSPHOINOSITIDE_METABOLIC_PROCESS                         | 27   | -0.41 | -1.66 | 0.00        | 0.22        |
| GLYCEROPHOSPHOLIPID_BIOSYNTHETIC_PROCESS                   | 26   | -0.44 | -1.65 | 0.00        | 0.22        |
| RESPONSE_TO_ENDOGENOUS_STIMULUS                            | 187  | -0.34 | -1.65 | 0.00        | 0.22        |
| NUCLEOSIDE_TRIPHOSPHATASE_ACTIVITY                         | 195  | -0.22 | -1.55 | 0.00        | 0.21        |
| SMALL_NUCLEAR_RIBONUCLEOPROTEIN_COMPLEX                    | 21   | -0.73 | -1.55 | 0.00        | 0.21        |
| PHOSPHOINOSITIDE_BIOSYNTHETIC_PROCESS                      | 20   | -0.47 | -1.63 | 0.00        | 0.21        |
| CELL_CYCLE_PHASE                                           | 158  | -0.34 | -1.57 | 0.00        | 0.21        |
| HSA04110_CELL_CYCLE                                        | 110  | -0.45 | -1.56 | 0.00        | 0.21        |
| PURINE_NUCLEOTIDE_BINDING                                  | 199  | -0.15 | -1.57 | 0.00        | 0.21        |
| MRNA_PROCESSING_GO_0006397                                 | 68   | -0.57 | -1.56 | 0.00        | 0.21        |
| HSA00564_GLYCEROPHOSPHOLIPID_METABOLISM                    | 67   | -0.18 | -1.63 | 0.00        | 0.21        |
| LIPID_BIOSYNTHETIC_PROCESS                                 | 89   | -0.23 | -1.55 | 0.00        | 0.21        |
| HYDROLASE_ACTIVITY_ACTING_ON_ACID_ANHYDRIDES               | 211  | -0.22 | -1.61 | 0.00        | 0.21        |
| NUCLEAR_LUMEN                                              | 342  | -0.42 | -1.64 | 0.00        | 0.21        |
| RNA_PROCESSING                                             | 161  | -0.58 | -1.63 | 0.00        | 0.21        |
| NUCLEOTIDE_BIOSYNTHETIC_PROCESS                            | 19   | -0.38 | -1.64 | 0.00        | 0.20        |
| DNA_DEPENDENT_DNA_REPLICATION                              | 53   | -0.49 | -1.65 | 0.00        | 0.20        |
| DNA_INTEGRITY_CHECKPOINT                                   | 21   | -0.48 | -1.58 | 0.00        | 0.20        |
| SPLICEOSOME                                                | 46   | -0.65 | -1.61 | 0.00        | 0.20        |
| COENZYME_METABOLIC_PROCESS                                 | 35   | -0.53 | -1.63 | 0.00        | 0.20        |
| HSA00440_AMINOPHOSPHONATE_METABOLISM                       | 15   | -0.62 | -1.63 | 0.00        | 0.20        |
| DAMAGED_DNA_BINDING                                        | 20   | -0.59 | -1.64 | 0.00        | 0.20        |
| MRNA_METABOLIC_PROCESS                                     | 79   | -0.54 | -1.57 | 0.00        | 0.20        |
| HSA00563_GLYCOSYLPHOSPHATIDYLINOSITOL_ANCHOR_BIOSYNTHESIS  | 22   | -0.44 | -1.65 | 0.00        | 0.20        |
| CHROMOSOMAL_PART                                           | 89   | -0.46 | -1.62 | 0.00        | 0.20        |
| ENDOPLASMIC_RETICULUM                                      | 271  | -0.22 | -1.64 | 0.00        | 0.20        |
| ORGANELLE_LUMEN                                            | 410  | -0.42 | -1.61 | 0.00        | 0.20        |
| DNA_DEPENDENT_ATPASE_ACTIVITY                              | 19   | -0.61 | -1.62 | 0.00        | 0.20        |
| CELL_CYCLE_PROCESS                                         | 181  | -0.36 | -1.62 | 0.00        | 0.20        |
| MEMBRANE_ENCLOSED_LUMEN                                    | 410  | -0.42 | -1.61 | 0.00        | 0.20        |
| CHROMATIN                                                  | 34   | -0.37 | -1.60 | 0.00        | 0.19        |
| PYROPHOSPHATASE_ACTIVITY                                   | 209  | -0.21 | -1.59 | 0.00        | 0.19        |
| GENERAL_RNA_POLYMERASE_II_TRANSCRIPTION_FACTOR_ACTIVITY    | 24   | -0.51 | -1.59 | 0.00        | 0.19        |
| DNA_REPLICATION_INITIATION                                 | 16   | -0.60 | -1.59 | 0.00        | 0.19        |
| NUCLEOTIDE_BINDING                                         | 212  | -0.16 | -1.60 | 0.00        | 0.19        |
| HSA00100_BIOSYNTHESIS_OF_STEROIDS                          | 24   | -0.43 | -1.60 | 0.00        | 0.19        |
| CHROMOSOME                                                 | 115  | -0.45 | -1.60 | 0.00        | 0.19        |
| DOUBLE_STRAND_BREAK_REPAIR                                 | 23   | -0.49 | -1.59 | 0.00        | 0.19        |
| COFACTOR_METABOLIC_PROCESS                                 | 49   | -0.51 | -1.60 | 0.00        | 0.19        |
| PURINE_RIBONUCLEOTIDE_BINDING                              | 194  | -0.15 | -1.60 | 0.00        | 0.19        |

**Supplemental Table 3. A full list of the ECM and growth factor genes in the leading edge subsets enriched in the CD44<sup>+</sup> cells.** FDR-q value: the estimated probability that the normalized enrichment score represents a false positive finding; NES: Normalized enrichment score; the enrichment score for the gene set after it has been normalized across analyzed gene sets; Size: Number of genes in the gene set after filtering out those genes not in the expression dataset; The more interesting gene sets achieve the maximum enrichment score. The ranking metric measures a gene's correlation with a phenotype. A positive value indicates correlation with the CD44 negative phenotype. Related to Fig.4B.

**Supplemental materials:**

Antibodies used for flow cytometry.

| Antigen                            | Conjugates   | Clone     | Isotype      | Sources               |
|------------------------------------|--------------|-----------|--------------|-----------------------|
| Rat TER-119                        | Purified     | TER-119   |              | Biologend             |
| Rat CD45                           | Purified     | 30-F11    |              | Biologend             |
| Rat B220                           | Purified     | RA3-6B2   |              | Biologend             |
| Rat CD4                            | Purified     | GK1.5     |              | Biologend             |
| Rat CD8                            | Purified     | 53-6.7    |              | Biologend             |
| Rat CD11B                          | Purified     | M1/70     |              | Biologend             |
| Rat GR1                            | Purified     | RB6-8C5   |              | Biologend             |
| Rat CD19                           | APC          | 1D3       |              | Imgenex               |
| Rat B220                           | PECY7        | RA3-6B2   |              | Biologend             |
| Rat CD45                           | PECy5        | 30-F11    |              | eBioscience           |
| Rat CD31                           | PECY7        | 390       |              | eBioscience           |
| Rat CD44                           | APCCY7       | IM7       | Rat IgG2b, k | eBioscience           |
| Rat TER-119                        | PECY5        | TER-119   |              | eBioscience           |
| Rat CD51                           | PE           | RMV-7     | Rat IgG1,k   | Biologend             |
| Rat SCA1                           | PE           | D7        | Rat IgG2a, k | BD                    |
| Rat SCA1                           | Pacific blue | D7        | Rat IgG2a, k | eBioscience           |
| Rat KI67                           | PE           | B56       | Mouse IgG1   | BD                    |
| Rat CD32/16                        | Purified     | 93        |              | eBioscience           |
| Goat anti-rat IgG (H+L) polyclonal | PECY5        | CLCC40106 |              | Cedar Lane laboratory |

Antibodies used for flow cytometry (continued).

| Antigen                     | Conjugates       | Clone   | Isotype        | Sources     |
|-----------------------------|------------------|---------|----------------|-------------|
| Rat CD140/PDGFRa            | APC              | APA5    | Rat IgG2a, k   | eBioscience |
| Rat CD19                    | PECY5            | 1D3     |                | Biolegend   |
| Rat B220                    | PECY5            | RA3-6B2 |                | Biolegend   |
| Mouse anti-rat/mouse CD90.1 | Alexa Fluor® 647 | OX-7    | Mouse IgG1, κ  | Ebioscience |
| Mouse CD45                  | eFluor® 450      | 2D1     | Mouse IgG1, κ  | Ebioscience |
| Mouse CD235                 | eFluor® 450      | 6A7M    | Mouse IgG1, κ  | Ebioscience |
| Mouse CD31                  | APC              | WM59    | Mouse IgG1, κ  | Ebioscience |
| Mouse CD146                 | PE               | SHM-57  | Mouse IgG2a, κ | Biolegend   |
| Mouse CD271                 | FITC             | ME20.4  | Mouse IgG1, κ  | Biolegend   |
| Mouse CD19                  | eFluor® 450      | HIB19   | Mouse IgG1, κ  | Ebioscience |
| Rat CD105                   | PE               | MJ7/18  | Rat IgG2a, k   | eBioscience |
| Rat CD106                   | APC              | 429     | Rat IgG2a, k   | Biolegend   |
| Mouse CD31                  | PE-CY7           | WM-59   | Mouse IgG1, k  | eBioscience |
| Mouse STRO-1                | Alexa Fluor® 647 | STRO-1  | Mouse IgM, λ   | Biolegend   |
| Mouse CD105                 | Alexa Fluor® 647 | 43A3    | Rat IgG1, k    | Biolegend   |
| Mouse CD106                 | PECY5            | STA     | Rat IgG1, k    | Biolegend   |
| Mouse CD29                  | APC              | TS2/16  | Rat IgG1, k    | Biolegend   |
| Mouse CD73                  | APC              | AD2     | Rat IgG1, k    | Biolegend   |

List of the probes used for Q- RT-PCR.

| Gene name | Assay ID      | Full name                                       |
|-----------|---------------|-------------------------------------------------|
| Fmod      | Mm00491215_m1 | Fibromodulin                                    |
| Angptl1   | Mm00472259_m1 | Angiopoietin-Like 1                             |
| Colla1    | Mm00801666_g1 | Collagen, Type I, alpha 1                       |
| Igf1      | Mm00439560_m1 | Insulin-Like Growth Factor 1                    |
| p27       | Mm00438168_m1 | p27/cdkn1b                                      |
| p21 CIP1  | Mm00432448_m1 | p21/cdkn1a                                      |
| Nov       | Mm00456855_m1 | Nephroblastoma overexpressed gene               |
| Nes       | Mm00450205_m1 | nestin                                          |
| Cdk6      | Mm00438163_m1 | Cyclin-dependent kinase 6                       |
| Hprt      | Mm00446968_m1 | hypoxanthine guanine phosphoribosyl transferase |
